# Supplementary material for: Optimization of double-vortex-assisted matrix solid-phase dispersion for the rapid determination of paraben preservative residues in leafy vegetables
Source: Royal Society of Chemistry journal article supplement (doi:10.1039/d0ra05658h), 2020-01-01
Supplement: d0ra05658h1.pdf [file d0ra05658h1.pdf]

## Supplementary Material

### Optimization of double-vortex-assisted matrix solid-phase dispersion for the rapid determination of paraben preservative residues in leafy vegetables

**Chun-Ju Yang<sup>a</sup>, Wu-Hsun Chung<sup>a,b</sup>, Wang-Hsien Ding<sup>a,\*</sup>**

**<sup>a</sup> Department of Chemistry, National Central University,  
Chung-Li 320, Taiwan**

**<sup>b</sup> Department of Chemical Engineering, Army Academy ROC,  
Chung-Li 320, Taiwan**

**Table S1.** Name (abbreviation), chemical structure, physical and chemical properties of five parabens used for the method development and validation.

| Name (Abbreviation):        | Structure                                                                           | MW (g/mol) | Molecular formula                              | pK <sub>a</sub> | LogK <sub>ow</sub> | Vapor pressure mm Hg (25°C) |
|-----------------------------|-------------------------------------------------------------------------------------|------------|------------------------------------------------|-----------------|--------------------|-----------------------------|
| <b>Methyl-paraben (MeP)</b> | 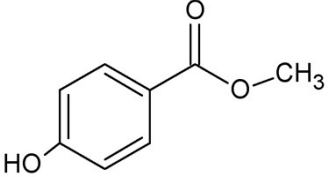   | 152.1476   | C <sub>8</sub> H <sub>8</sub> O <sub>3</sub>   | 8.5             | 1.96               | 2.37×10 <sup>-4</sup>       |
| <b>Ethyl-paraben (EtP)</b>  |    | 166.1742   | C <sub>9</sub> H <sub>10</sub> O <sub>3</sub>  | 8.5             | 2.47               | 9.29×10 <sup>-5</sup>       |
| <b>Propyl-paraben (PrP)</b> |   | 180.2008   | C <sub>10</sub> H <sub>12</sub> O <sub>3</sub> | 7.91            | 3.04               | 3.07×10 <sup>-4</sup>       |
| <b>Butyl-paraben (BuP)</b>  |  | 194.2275   | C <sub>11</sub> H <sub>14</sub> O <sub>3</sub> | 8.47            | 3.57               | 2.51×10 <sup>-4</sup>       |
| <b>Benzyl-paraben (BzP)</b> |  | 228.2438   | C <sub>14</sub> H <sub>12</sub> O <sub>3</sub> | 8.5             | 3.70               | No data available           |

The values of pK<sub>a</sub>, Log Kow and vapor pressure are reported in PubChem <https://pubchem.ncbi.nlm.nih.gov/compound/>

**Table S2.** Analysis of variance (ANOVA) for Factorial Multilevel Categorical design

| Source                       | Sum of Squares ( $\times 10^{11}$ ) | df | Mean Square ( $\times 10^{11}$ ) | F Value | <i>p</i> -value Prob > F |
|------------------------------|-------------------------------------|----|----------------------------------|---------|--------------------------|
| Model                        | 117.92                              | 5  | 39.31                            | 39.73   | < 0.0001*                |
| A-Sorbent                    | 6.19                                | 2  | 6.19                             | 3.79    | 0.1367                   |
| B-Extracting solvent         | 91.07                               | 1  | 91.07                            | 92.03   | < 0.0001*                |
| C- Extraction mechanic force | 6.53                                | 1  | 6.53                             | 6.59    | 0.0332*                  |
| BC                           | 20.34                               | 1  | 20.34                            | 20.55   | 0.0019*                  |

df: Degree of freedom.

\*Significant

**Table S3.** Experimental results based on the Box-Behnken design for DVA-MSPD and their total peak area

| Run | Vortex time (min) | C18 amount (g) | MeOH (mL) | Total Peak Area ( $\times 10^5$ ) |
|-----|-------------------|----------------|-----------|-----------------------------------|
| 1   | 15                | 0.6            | 5         | 33.52                             |
| 2   | 10                | 1              | 5         | 29.96                             |
| 3   | 10                | 1              | 10        | 40.97                             |
| 4   | 5                 | 1              | 7.5       | 42.37                             |
| 5   | 5                 | 0.6            | 5         | 33.24                             |
| 6   | 15                | 1              | 7.5       | 34.73                             |
| 7   | 5                 | 0.6            | 10        | 37.87                             |
| 8   | 10                | 0.6            | 7.5       | 41.45                             |
| 9   | 10                | 0.6            | 7.5       | 41.10                             |
| 10  | 10                | 0.6            | 7.5       | 41.51                             |
| 11  | 15                | 0.2            | 7.5       | 55.13                             |
| 12  | 10                | 0.2            | 5         | 46.81                             |
| 13  | 10                | 0.2            | 10        | 48.36                             |
| 14  | 15                | 0.6            | 10        | 36.84                             |
| 15  | 5                 | 0.2            | 7.5       | 48.49                             |

**Table S4.** Analysis of variance (ANOVA) of the Box-Behnken design for total peak area

| Source         | Sum of Squares ( $\times 10^9$ ) | df | Mean Square ( $\times 10^9$ ) | F Value | <i>p</i> -value Prob > F |
|----------------|----------------------------------|----|-------------------------------|---------|--------------------------|
| Model          | 6463.5                           | 9  | 718.2                         | 105.0   | < 0.0001*                |
| A-Vortex time  | 3.9                              | 1  | 3.9                           | 0.6     | 0.4860                   |
| B-C18          | 3219.3                           | 1  | 3219.3                        | 470.7   | < 0.0001*                |
| C-MeOH         | 525.5                            | 1  | 525.5                         | 76.8    | 0.0003*                  |
| AB             | 509.6                            | 1  | 509.6                         | 74.5    | 0.0003*                  |
| AC             | 4.3                              | 1  | 4.3                           | 0.6     | 0.4632                   |
| BC             | 223.9                            | 1  | 223.9                         | 32.7    | 0.0023*                  |
| A <sup>2</sup> | 49.9                             | 1  | 49.9                          | 7.3     | 0.0425                   |
| B <sup>2</sup> | 920.8                            | 1  | 920.8                         | 134.7   | < 0.0001*                |
| C <sup>2</sup> | 857.2                            | 1  | 857.2                         | 126.4   | < 0.0001*                |
| Lack-of-Fit    | 33.2                             | 3  | 11.1                          | 2.36    | 0.431                    |

df: Degree of freedom.

\*Significant

**Table S5.** Spiked recoveries (%) of individual target analyte for each experimental condition.

| <b>Run</b> | <b>Vortex time<br/>(min)</b> | <b>C18<br/>amount (g)</b> | <b>MeOH<br/>(mL)</b> | <b>MeP</b> | <b>EtP</b> | <b>(%)<br/>PrP</b> | <b>BuP</b> | <b>BzP</b> |
|------------|------------------------------|---------------------------|----------------------|------------|------------|--------------------|------------|------------|
| 1          | 15                           | 0.6                       | 5                    | 35.7       | 34.5       | 53.8               | 68.1       | 76.3       |
| 2          | 10                           | 1                         | 5                    | 37.4       | 37.1       | 49.8               | 59.1       | 68.8       |
| 3          | 10                           | 1                         | 10                   | 33.9       | 42.0       | 72.8               | 80.0       | 80.5       |
| 4          | 5                            | 1                         | 7.5                  | 38.1       | 51.6       | 77.1               | 77.9       | 81.0       |
| 5          | 5                            | 0.6                       | 5                    | 31.8       | 33.6       | 57.5               | 69.9       | 71.6       |
| 6          | 15                           | 1                         | 7.5                  | 38.0       | 35.5       | 60.8               | 68.0       | 75.2       |
| 7          | 5                            | 0.6                       | 10                   | 38.4       | 45.5       | 64.1               | 72.6       | 80.2       |
| 8          | 10                           | 0.6                       | 7.5                  | 48.3       | 43.5       | 74.9               | 76.4       | 82.4       |
| 9          | 10                           | 0.6                       | 7.5                  | 48.4       | 56.7       | 76.9               | 72.8       | 77.7       |
| 10         | 10                           | 0.6                       | 7.5                  | 53.4       | 55.7       | 78.0               | 71.4       | 75.2       |
| 11         | 15                           | 0.2                       | 7.5                  | 77.8       | 80.4       | 82.9               | 94.8       | 97.9       |
| 12         | 10                           | 0.2                       | 5                    | 67.3       | 75.3       | 74.8               | 80.1       | 85.5       |
| 13         | 10                           | 0.2                       | 10                   | 82.6       | 70.3       | 80.4               | 81.1       | 83.7       |
| 14         | 15                           | 0.6                       | 10                   | 69.0       | 59.9       | 64.4               | 65.2       | 66.1       |
| 15         | 5                            | 0.2                       | 7.5                  | 86.1       | 74.7       | 77.0               | 81.8       | 84.1       |
